# Supplementary material for: COVID-19 Worries Predict Aging Preparation: Culture- and Domain-Specific Perspectives
Source: Oxford University Press journal article supplement (doi:10.1093/geronb/gbac078), 2022-05-21
Supplement: gbac078_suppl_supplementary_material.pdf [file gbac078_suppl_supplementary_material.pdf]

## Supplementary Material

## S1. Full Model Controlled for Sample Type and Pandemic-Related Confounders

|                                               | <i>Est.</i> | <i>S.E.</i> |
|-----------------------------------------------|-------------|-------------|
| Intercept                                     | 3.10***     | 0.58        |
| Housing                                       | 0.03        | 0.05        |
| Care                                          | 0.08        | 0.05        |
| Connectedness                                 | 0.75***     | 0.05        |
| EoL                                           | 0.53***     | 0.05        |
| Newly Recruited Sample (vs. Follow-Up Sample) | 0.02        | 0.07        |
| New Cases per Million                         | 0.00        | 0.00        |
| New Deaths per Million                        | -0.01       | 0.03        |
| Stringency Index                              | 0.00        | 0.01        |
| People Vaccinated per Hundred                 | 0.00        | 0.02        |
| Age                                           | 0.01***     | 0.00        |
| Female                                        | 0.11        | 0.07        |
| Non-Binary                                    | -0.42       | 0.44        |
| Subjective Health                             | -0.03       | 0.03        |
| ISCED                                         | -0.05**     | 0.02        |
| Steady Relationship                           | -0.19**     | 0.07        |
| Hong Kong                                     | 1.87***     | 0.21        |
| Worries                                       | 0.34***     | 0.05        |

|                                 |         |      |
|---------------------------------|---------|------|
| Worries*Hong Kong               | 0.02    | 0.10 |
| Worries*Hong Kong*Housing       | -0.14   | 0.11 |
| Worries*Hong Kong*Care          | -0.21*  | 0.11 |
| Worries*Hong Kong*Connectedness | -0.23*  | 0.11 |
| Worries*Hong Kong*EoL           | -0.32** | 0.11 |
| $\sigma^2_{\text{Intercept}}$   |         | 1.31 |
| $\sigma^2_{\text{Domain}}$      |         | 1.61 |
| $R^2_{\text{Marginal}}$         |         | .21  |

---

*Note.* \* $p < .05$ , \*\* $p < .01$ , \*\*\* $p < .001$ . Housing, Care, Connectedness, and EoL

stand for pandemic-induced aging preparation for housing arrangements in old age, need for nursing care, social connectedness in old age, and end of life, respectively. Germany and financial preparation served as the reference categories for culture and domain, respectively. ISCED stands for the International Standard Classification of Education. For the pandemic-related confounders, rates reported on the date each participant had been surveyed were counted and statistically controlled for.
